# Supplementary material
Source: Springer Nature journal article supplement (https://www.springermedizin.de/resource/supplementary/12883_2008_189_MOESM2_ESM.pdf/9457038)

# T-Score Change From Baseline to 6 Months

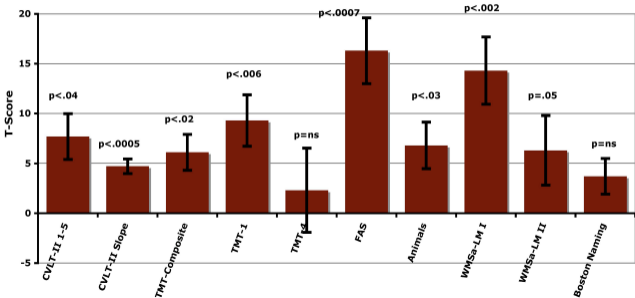

Supplement: MOESM2 [file 9457038]
